# Supplementary material for: The Effectiveness of Smartphone Apps for Lifestyle Improvement in Noncommunicable Diseases: Systematic Review and Meta-Analyses
Source: PubMed Central journal article supplement (PMC5960039; doi:10.2196/jmir.9751), 2018-05-04
Supplement: jmir_v20i5e162_app1.pdf [file jmir_v20i5e162_app1.pdf]

### **Systematic search conducted 23th of February 2017.**

**Embase:** (mobile application/ OR (mobile health or smartphone app\* or phone app\* or mobile app\* or cellphone app\* or telephone app\* or mhealth).tw,kw. AND non insulin dependent diabetes mellitus/ OR cardiovascular disease/ or exp heart disease/ or exp vascular disease/ OR exp neoplasm/ OR exp lung disease/) AND (follow up/ OR (longterm or long-term or follow-up or one-year result\* or month\* result\*).tw,kw.)

Resulted in 192 articles

**Medline:** (Mobile Applications/ OR (mobile health or smartphone app\* or phone app\* or mobile app\* or cellphone app\* or telephone app\* or mhealth).tw,kw,kf.) AND (diabetes mellitus, type 2/ or diabetes mellitus, lipoatrophic/ OR cardiovascular diseases/ or exp heart diseases/ or exp vascular diseases/ OR exp Lung Diseases/ OR exp Neoplasms/)

Resulted in 525 articles

**Cinahl:** ((MH "Mobile Applications") OR TI ( (mobile health or smartphone app\* or mobile app\* or phone app\* or cellphone app\* or Telephone app\* or mhealth) ) OR AB ( (mobile health or smartphone app\* or phone app\* or mobile app\* or cellphone app\* og telephone app\* or mhealth) ) AND ((MH "Diabetes Mellitus, Type 2") OR (MH "Vascular Diseases+") OR (MH "Heart Diseases+") OR (MH "Cardiovascular Diseases+") OR (MH "Neoplasms+") OR (MH "Lung Diseases+"))

Resulted in 220 articles

**Academic Search Premier:** TI ( (mobile health or smartphone app\* or mobile app\* or phone app\* or cellphone app\* or Telephone app\* or mhealth) ) OR AB ( (mobile health or smartphone app\* or phone app\* or mobile app\* or cellphone app\* og telephone app\* or mhealth) ) AND ((TI Diabetes\* OR AB Diabetes\*) OR (TI ( Cancer\* or neoplasm\* ) OR AB ( Cancer\* or neoplasm\* ) ) OR (TI ( pulmonary disease\* or lung disease\* or respiratory disease\* ) OR AB ( pulmonary disease\* or lung disease\* or respiratory disease\* )) OR (TI ( Cardiovascular disease\* or coronary heart disease\* or vascular disease\* or stroke ) OR AB ( Cardiovascular disease\* or coronary heart disease\* or vascular disease\* or stroke ))

Resulted in 560 articles

**Cochrane reviews and trials:** ([Mobile Applications] OR ((mobile next health or phone next app\* or cellphone next app\* or telephone next app\* or mobile next app\* or Smartphone next app\* or mhealth):ti,ab,kw)) AND ([Diabetes Mellitus, Type 2] OR [Cardiovascular Diseases] OR [Heart Diseases] OR [Vascular Diseases] OR [Lung Diseases] OR [Neoplasms])

Resulted in 91 articles (3 Cochrane Reviews and 88 trials)
